# Supplementary material for: Modulating in vitro lung fibroblast activation via senolysis of senescent human alveolar epithelial cells
Source: PubMed Central journal article supplement (PMC11272128; doi:10.18632/aging.205994), 2024-06-29
Supplement: aging-16-205994-s002.pdf [file aging-16-205994-s002.pdf]

## SUPPLEMENTARY TABLES

**Supplementary Table 1. Demographic information of human lung tissue donors.**

| Identifier | Condition         | Age   | Sex    | Ethnicity        |
|------------|-------------------|-------|--------|------------------|
| H1         | Non-fibrotic Lung | 57 yr | Male   | Caucasian        |
| H2         | IPF Lung          | 57 yr | Male   | Hispanic         |
| H3         | IPF Lung          | 72 yr | Male   | Not disclosed    |
| H4         | ILD Lung          | 51 yr | Male   | African American |
| H5         | IPF Lung          | 75 yr | Female | Caucasian        |

**Supplementary Table 2. Multiplex assessment of additional secreted proteins in the senescent and non-senescent AEC conditioned medium.**

| Protein       | Concentration (pg/mL) |                | Concentration SEM ( $\pm$ ) |                | Concentration/CellTiter-Glo (Ratio) |                | Senescence increase (Fold) | P-value (Paired <i>t</i> -test) |
|---------------|-----------------------|----------------|-----------------------------|----------------|-------------------------------------|----------------|----------------------------|---------------------------------|
|               | Non-senescent AECs    | Senescent AECs | Non-senescent AECs          | Senescent AECs | Non-senescent AECs                  | Senescent AECs |                            |                                 |
| sCD40L        | 31.8                  | 26.4           | 11.8                        | 9.8            | 1.82E-05                            | 5.82E-05       | 3.2                        | 0.105                           |
| EGF           | 6082.8                | 8968.3         | 474.1                       | 799.6          | 4.11E-03                            | 2.32E-02       | 5.6                        | 0.015                           |
| Eotaxin       | 11.1                  | 8.2            | 3.5                         | 1.5            | 6.18E-06                            | 1.93E-05       | 3.1                        | 0.029                           |
| FGF-2         | 781.5                 | 317.4          | 341.8                       | 295.1          | 4.79E-04                            | 1.50E-03       | 3.1                        | 0.482                           |
| G-CSF         | 1591.4                | 1592.2         | 526.1                       | 763.7          | 1.24E-03                            | 2.71E-03       | 2.2                        | 0.199                           |
| GM-CSF        | 1151.7                | 529.4          | 206.0                       | 288.3          | 7.21E-04                            | 1.04E-03       | 1.4                        | 0.090                           |
| GRO $\alpha$  | 752.3                 | 443.8          | 90.2                        | 211.9          | 4.64E-04                            | 8.02E-04       | 1.7                        | 0.135                           |
| IL-1 $\alpha$ | 1312.2                | 2435.7         | 186.5                       | 729.6          | 9.56E-04                            | 5.93E-03       | 6.2                        | 0.014                           |
| IL1RA         | 64.6                  | 25.8           | 28.7                        | 4.9            | 3.00E-05                            | 6.61E-05       | 2.2                        | 0.387                           |
| IL-9          | 13.2                  | 12.3           | 0.5                         | 4.6            | 4.61E-06                            | 1.62E-05       | 3.5                        | 0.435                           |
| IL-12p40      | 9.4                   | 11.0           | 1.1                         | 0.5            | 3.27E-06                            | 1.35E-05       | 4.1                        | 0.088                           |
| IL-22         | 20.3                  | 22.7           | 0.2                         | 5.8            | 7.12E-06                            | 2.93E-05       | 4.1                        | 0.346                           |
| IL-27         | 20.2                  | 19.7           | 1.7                         | 1.2            | 6.53E-06                            | 2.20E-05       | 3.4                        | 0.003                           |
| IP10          | 6.3                   | 5.1            | 2.2                         | 1.2            | 3.39E-06                            | 1.25E-05       | 3.7                        | 0.036                           |
| MCP-1         | 1347.3                | 226.1          | 433.1                       | 91.4           | 7.20E-04                            | 5.74E-04       | 0.8                        | 0.307                           |
| MCP-3         | 12.1                  | 9.9            | 3.2                         | 0.1            | 4.21E-06                            | 1.25E-05       | 3.0                        | 0.035                           |
| M-CSF         | 325.3                 | 149.0          | 98.9                        | 22.5           | 1.35E-04                            | 1.78E-04       | 1.3                        | 0.098                           |
| PDGF-AB/BB    | 89.9                  | 42.6           | 31.9                        | 1.2            | 4.66E-05                            | 1.14E-04       | 2.5                        | 0.267                           |
| TGF $\alpha$  | 384.8                 | 166.8          | 30.9                        | 53.8           | 2.57E-04                            | 3.41E-04       | 1.3                        | 0.263                           |
| TNF $\alpha$  | 282.1                 | 54.2           | 72.1                        | 24.2           | 1.69E-04                            | 1.22E-04       | 0.7                        | 0.019                           |
| TNF $\beta$   | 8.4                   | 5.6            | 1.0                         | 2.1            | 5.20E-06                            | 1.11E-05       | 2.1                        | 0.065                           |
| VEGFA         | 117.7                 | 14.1           | 47.4                        | 5.3            | 5.10E-05                            | 1.63E-05       | 0.3                        | 0.093                           |

The data presented reflects the average secreted concentration and SEM of 3 AEC donors, each with 3 technical well-level replicates per condition. Well-level replicates were first normalized to their matched CellTiter-Glo value prior to averaging to yield one value per donor, then the 3 AEC donors were averaged. Fold increase with senescence was conducted on the final ratios and a paired *t*-test was performed in GraphPad Prism. Proteins must have been within the linear range of detection in at least 2 of 3 donors to be included for the ratio and fold increase analysis. Not detected (below limit of quantitation): FLT-3L, Fractalkine, IFN- $\alpha$ 2, IFN $\gamma$ , IL-2, IL-3, IL-4, IL-5, IL-7, IL-10, IL-12p70, IL-13, IL-15, IL-17A, IL-17E, IL-17F, IL-18, MDC, MIG, MIP-1 $\alpha$ , MIP-1 $\beta$ , PDGF-AA. Not included in panel: RANTES, IL-1 $\beta$ , IL-6, IL-8.

**Supplementary Table 3. TaqMan probe identifiers for human gene expression profiling.**

| <b>Species</b> | <b>Gene</b> | <b>TaqMan Probe ID</b> |
|----------------|-------------|------------------------|
| Human          | $\beta$ 2M  | Hs00187842_m1          |
| Human          | GAPDH       | Hs02788624_g1          |
| Human          | SFTPC       | Hs00161628_m1          |
| Human          | CAV1        | Hs00971716_m1          |
| Human          | MUC1        | Hs00159357_m1          |
| Human          | KRT18       | Hs02827483_g1          |
| Human          | EPCAM       | Hs00901885_m1          |
| Human          | CDH1        | Hs01023894_m1          |
| Human          | CDH11       | Hs00901479_m1          |
| Human          | SERPINE1    | Hs00167155_m1          |
| Human          | KRT8        | Hs01595539_g1          |
| Human          | KRT17       | Hs00356958_m1          |
| Human          | KRT5        | Hs00361185_m1          |
| Human          | LAMB1       | Hs01055960_m1          |
| Human          | OCLN        | Hs05465837_g1          |
| Human          | CLDN1       | Hs00221623_m1          |
| Human          | VIM         | Hs00958111_m1          |
| Human          | FN1         | Hs01549976_m1          |
| Human          | CDH2        | Hs00983056_m1          |
| Human          | CDKN1A      | Hs00355782_m1          |
| Human          | CDKN2A      | Hs00923894_m1          |
| Human          | COL3A1      | Hs00943809_m1          |
| Human          | COL4A1      | Hs00266237_m1          |
| Human          | TIMP1       | Hs01092512_g1          |
| Human          | CCL2        | Hs00234140_m1          |
| Human          | ACTA1       | Hs00559403_m1          |
| Human          | CTHRC1      | Hs00298917_m1          |
| Human          | FN1         | Hs01549976_m1          |
| Human          | COL1A1      | Hs00164004_m1          |
| Human          | PPIA        | Hs04194521_s1          |
| Human          | CD44        | Hs01075864_m1          |
| Human          | ACTA2       | Hs00426835_g1          |
